# Supplementary material for: Thermally robust Al2O3–La3Si6N11:Ce3+ composite phosphor-in-glass (PiG) films for high-power and high-brightness laser-driven lighting
Source: Royal Society of Chemistry journal article supplement (doi:10.1039/d2tc03535a), 2022-10-13
Supplement: d2tc03535a1.pdf [file d2tc03535a1.pdf]

**Supporting Information: Thermally robust  $\text{Al}_2\text{O}_3\text{-La}_3\text{Si}_6\text{N}_{11}\text{:Ce}^{3+}$   
composite phosphor-in-glass (PiG) films for high-power and  
brightness laser-driven lighting**

Min-Hang Huang <sup>a</sup>, Qiang-Qiang Zhu <sup>a</sup>, Shuxing Li <sup>b</sup>, Yue Zhai <sup>a</sup>, Hong Zhang <sup>a</sup>, Le Wang <sup>a,\*</sup>, and Rong-Jun Xie <sup>b,\*</sup>

<sup>a</sup> College of Optics and Electronic Technology, China Jiliang University, Hangzhou 310018, China

<sup>b</sup> Fujian Key Laboratory of Surface and Interface Engineering for High Performance Materials, College of Materials, Xiamen University, Xiamen 361005, China

**\*Corresponding Author:**

Email:

[calla@cjl.u.edu.cn](mailto:calla@cjl.u.edu.cn) (Le Wang)

[rjxie@xmu.edu.cn](mailto:rjxie@xmu.edu.cn) (Rong-Jun Xie)

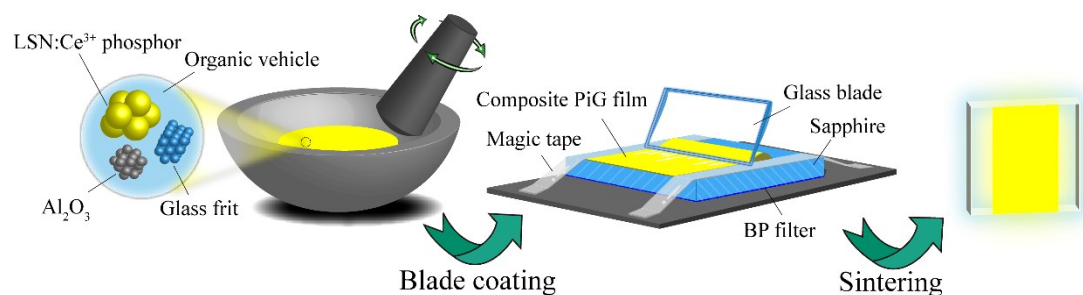

Figure S1 Fabrication of the  $\text{Al}_2\text{O}_3\text{-LSN:Ce}^{3+}$  composite PiG film on a 1DPC-coated sapphire substrate.

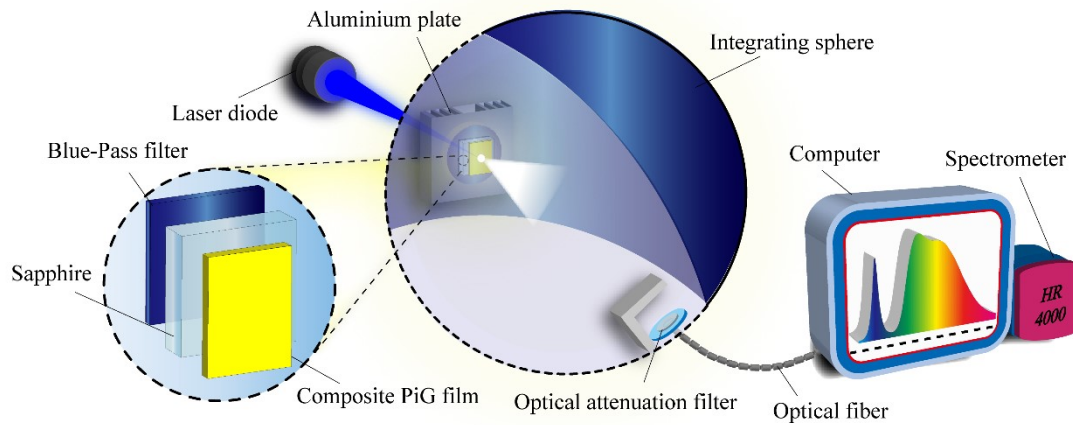

Figure S2 Schematics of measuring the optical properties of laser-driven white light in a transmissive configuration.

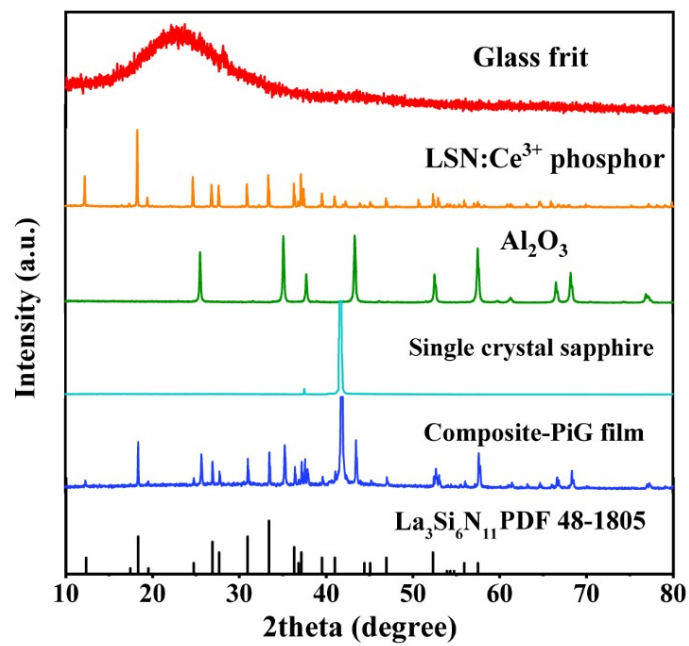

Figure S3. XRD patterns of glass frits, LSN:Ce<sup>3+</sup>, Al<sub>2</sub>O<sub>3</sub> particles, single crystal sapphire, and the composite PiG film.

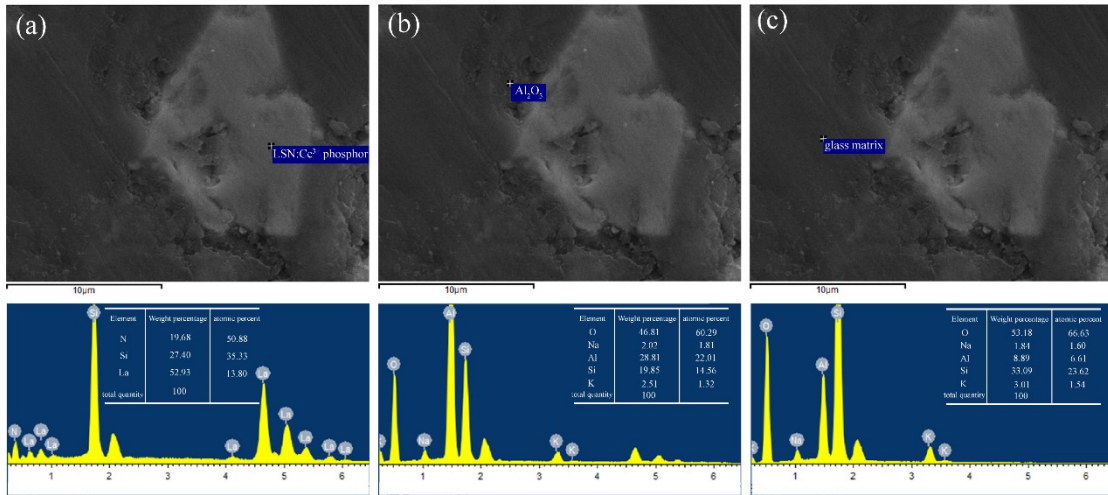

Figure S4 Elemental composition of LSN: Ce<sup>3+</sup> phosphor particles quantified by the EDS.

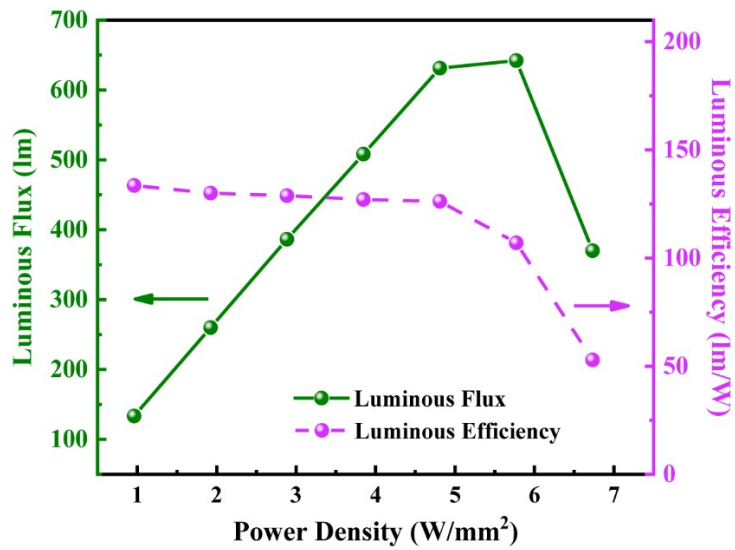

Figure S5 Luminous flux and luminous efficiency of the M3G2A5-50 sample.
